# Supplementary material for: Using BAC transgenesis in zebrafish to identify regulatory sequences of the amyloid precursor protein gene in humans
Source: PubMed Central journal article supplement (PMC3546842; doi:10.1186/1471-2164-13-451), 2012-09-04
Supplement: 1471-2164-13-451-S1.pdf [file 1471-2164-13-451-S1.pdf]

## Sequences corresponding to peptide domains common to all members within gene family

### **A** Partial Exon 2 sequence of zebrafish E4BP4 gene - 147 aa E4BP4 peptide synthesized shown in green

GCAAGCCATTAAGAAAGAGCCCCATGCAGTGGGCCCTACGGTGGAGAGGACGCCTTGGTGCTGGCTGTAGCTTTGCAAG  
GGACAGACAGGGACCTGATTAACCACAACTGTCCACCCTACCTTTCAAGTCCAAGTCCACCAGCTGTGCGCCGGAAACGTG  
AGTTCATACCCGATGAGAAGAAAGACAACCTATATTGGGAGAGAAGGCGCAAGAACAATGAAGCAGCCAAGCGCTCCAGGG  
AAAAGCGCAGACTAAATGACATGGTTCTGGAGAACAAGCTTATGGCCCTTGGGGAAGAGAACGCATCGCTGAAAGCTGAGC  
TTTTGTCACTTAACTCAGGTTTGGTCTAGTGAGCTCAGCCGCTTATGCTCAGGAGGTGCAGAACATCTCCACTTCCACTGC  
TGCGCTCTACCAGGACTTTATGTCACCCAGTGCCACCAAGGATTCTACCCAAGTGATCTGGAGCCAACGCGTTTGACCAGC  
AGCTGCATTCGGTCATCAAGCACTCACCTCACAGCGC

dal vlavalqgtd rdlinhklst lpfkskstsc rrkrefipde kkdnywerr rknneaakrs rekrrlndmv lenklmalge  
enaslkaell slklrfglvs saayaqevqn iststaalyq dfmmpsatk d sypsdleptr ltss

### **B** Partial Exon 3 sequence of zebrafish FKD1 gene - 154 aa FKD peptide synthesized shown in blue

CCTGCCACCTGCAAACCCTCCAAAGGCATATGCTGAGATCAACTCCAGCGAACCCAGAGTTTCAAGAGCTGAAATCAGTTTA  
CCGGCGGACATTAAGCCATGCCAAACCGCCGTA CTCTCTCATCTGCATGGCCATCCAGCAGTCTCCAGCCAA  
GAGACTGACTCTGAACGAGATCTACGACTGGATCCGTCAGCTTTCCCATATTACAGACAGAATCAGCAGAGATGGCAGAA  
CTCCATCCGCCATTCCCTGTCCTTCAACGACTGCTTCGTGCGTGTCCCGAGATCTCCAGACTCTCCCGGAAAAGGCTCAT  
ACTGGGCTTTACACCCTGACTCCGGTAACATGTTTGAAAACGGATGCTACATGCGCCGCCAGAAGCGCTTCAAGTGTCAA  
AAATCCACATCAACAGGCAAAAACCTCAGAAGGAGAAGACGTGAAAGTGGAAGAAGAAAAGGAAGGAGATCAAGTCAGT  
CAGCTCCTGTAAATCACCTACAAGTGATGCTACAAAACAG

ayaein ssepefqlk svyrrtlsha kppysyisli cmaiqqspak rltlneydw irqlfpyyrq nqqrwqnsir hslsfndcfv  
rvprspdspg kgsywalhpd sgnmfengcy mrrqkrfkq kststgknse gedvkvekkk rkeiksvs

Note: Both peptides have additional amino acids from vector pET-30a(+)
