# Supplementary material for: Using BAC transgenesis in zebrafish to identify regulatory sequences of the amyloid precursor protein gene in humans
Source: PubMed Central journal article supplement (PMC3546842; doi:10.1186/1471-2164-13-451), 2012-09-04
Supplement: 1471-2164-13-451-S3.pdf [file 1471-2164-13-451-S3.pdf]

**Primers used for detecting mRNA levels of E4BP4 in the Undifferentiated cell line SHSY5Y**

Exon 2,3 fp (GCG CTG GAG GGC GCG GCC T)

Exon 2,3 rp (TCT TCT CCG TCT TAA TCT TCA C)

Exon 3,4 rp (CAC CAC TAG AGT GTT GAC ATG)

or exon 3 fp (GCT GCA GCC TAG TGA AAT C) pairs with  
exon 3,4 rp (GAA GAG CTG GCT CCA ATC ATT GT)

exon 4,5 fp (ACT TGT TGG TTC TGT TTA TCA ACT A)

exon 4,5 rp (GCA ATA CTG CAG GAT GCC TTC CTT G)
