# Supplementary material for: Using BAC transgenesis in zebrafish to identify regulatory sequences of the amyloid precursor protein gene in humans
Source: PubMed Central journal article supplement (PMC3546842; doi:10.1186/1471-2164-13-451), 2012-09-04
Supplement: 1471-2164-13-451-S4.pdf [file 1471-2164-13-451-S4.pdf]

## Intron-1 Enhancer Sequence of *appb* gene

TCCAAAGCATTCTTCTGAGAATCTCTCTCTCTCTCTCTCTCTCTCTCTCTCTCTCTATATATA  
 TATAAACTAGACCACAGCACAATCCCTTTCGGTCA GTATTGTTATTACATAAGACATCAGC  
 AATAAAGAAAAAGATTGACCCACTGTAATTGGTTTTTCACATTAGTATTGATTCACGTAACAC  
 TACAGATGAATGGAATCAAGTTTGTGGGTCTTGGTACATGTGTGCTATAGCTTTGCCATTG  
 TTCCAAAAGTATTTAGTTAATTTAATTCTTCAAATAATTAGTAAGTCTTAAGCATGTCAA  
 GTGCTTAAATCTGACCTCTTGTAAGTCATTATTTCTTTCTGACTGGTTCAATAAAAAAGCC  
 CCTTTAGGCTTTTTTTCATTATAGGTGCCACTTGTAGGTACTGTGCCAAAACAATCTTTGACA  
 GTTTGCGCTGTCACCTCTTACTGGTCACTATAACCACACACAAGTCATTTTGGCTGAAAG  
 GTCCTTTGCTTTAGCTTGCTTGTAATTAATAATCTGTTTTTCAGTCAGCCTCCATCTGAAAA  
 AGGCCTTTCTTTGTTTGACTGGGAAATGTCACTGGAA CATGTAAACACGGTCGGTTTTTAAA  
 TTATGTTTTTGAGAGCTACAAAAGCTACTTCATTGATTTTGACAGCCTTCAAGATTAAGCCA  
 GAGCTGAATGACTCTTGAAAGCTGCACATTTCAATTTGATAGATGCATTAATGTGGATCCT  
 GAGCTGCTATGACAACCTGACTGAGA CACTATTTCTGGGAGATTGATATTCGCAGATGATTA  
 GCTTTACCAATGGCTCAGTGGATGTCGGTGTTAAAGCATTTTGAGC ACCATGGTAATTCT  
 ATCATAAATGTACATCTATAGCTTATGTGCAGCATAACAGAA T GATCTTACTACTGCAATGAGC  
 TGTCGCACACATGGGTTTCCTAAAGAGCTAACTACTGTACTGCGGTCAGTGTAATTACAGT  
 CTTCTGTTTTTAAACTGCCATACAGCAGAGAGATGTTTTATTGCGCTTT

CTCTCT.....ATATAT

CT-repeat

CATGTAAAC

XFD1

GTATTGTTAT

SOX5

ACCATGGTAAT

OCT1

TTACATAA

E4BP4

GATCTTACT

GATA3
