# Supplementary material for: Using BAC transgenesis in zebrafish to identify regulatory sequences of the amyloid precursor protein gene in humans
Source: PubMed Central journal article supplement (PMC3546842; doi:10.1186/1471-2164-13-451), 2012-09-04
Supplement: 1471-2164-13-451-S5.pdf [file 1471-2164-13-451-S5.pdf]

Locations of E4BP4 & XFD1 putative binding sites at zebrafish *apb* locus

|               |                |                |                |                |                |                |                |                |                |                |                |                 |
|---------------|----------------|----------------|----------------|----------------|----------------|----------------|----------------|----------------|----------------|----------------|----------------|-----------------|
| Site          | X <sub>1</sub> | E <sub>1</sub> | X <sub>2</sub> | E <sub>2</sub> | E <sub>3</sub> | E <sub>4</sub> | E <sub>5</sub> | E <sub>6</sub> | E <sub>7</sub> | E <sub>8</sub> | E <sub>9</sub> | E <sub>10</sub> |
| Location (kb) | -47.5          | -44.5          | -44.0          | -42.7          | -38.7          | -38.1          | -33.7          | -31.6          | -31.3          | -25.3          | -9.3           | -3.8            |

|               |                 |                |                 |                 |                |                |                |                 |                 |                 |                 |
|---------------|-----------------|----------------|-----------------|-----------------|----------------|----------------|----------------|-----------------|-----------------|-----------------|-----------------|
| Site          | E <sub>11</sub> | X <sub>3</sub> | E <sub>12</sub> | E <sub>13</sub> | X <sub>4</sub> | X <sub>5</sub> | X <sub>6</sub> | E <sub>14</sub> | E <sub>15</sub> | E <sub>16</sub> | E <sub>17</sub> |
| Location (kb) | 2.9             | 3.3            | 7.2             | 10.8            | 17.6           | 43.8           | 47.0           | 48.3            | 61.4            | 69.5            | 72.2            |

Locations of E4BP4 & XFD1 putative binding sites at human APP locus

|               |                |                |                |                |                |                |                |                |                |                |                 |                 |
|---------------|----------------|----------------|----------------|----------------|----------------|----------------|----------------|----------------|----------------|----------------|-----------------|-----------------|
| Site          | X <sub>1</sub> | E <sub>1</sub> | E <sub>2</sub> | E <sub>3</sub> | E <sub>4</sub> | E <sub>5</sub> | E <sub>6</sub> | E <sub>7</sub> | E <sub>8</sub> | E <sub>9</sub> | E <sub>10</sub> | E <sub>11</sub> |
| Location (kb) | -48.6          | 5.0            | 42.0           | 44.7           | 46.0           | 47.6           | 51.5           | 55.3           | 72.3           | 86.5           | 97.2            | 120.1           |

|               |                 |                 |                 |                 |                 |                 |                 |                |                 |                 |                 |                 |
|---------------|-----------------|-----------------|-----------------|-----------------|-----------------|-----------------|-----------------|----------------|-----------------|-----------------|-----------------|-----------------|
| Site          | E <sub>12</sub> | E <sub>13</sub> | E <sub>14</sub> | E <sub>15</sub> | E <sub>16</sub> | E <sub>17</sub> | E <sub>18</sub> | X <sub>2</sub> | E <sub>19</sub> | E <sub>20</sub> | E <sub>21</sub> | E <sub>22</sub> |
| Location (kb) | 118.2           | 118.3           | 136.5           | 164.6           | 189.0           | 211.5           | 251.6           | 260.6          | 260.7           | 307.3           | 313.4           | 335.5           |
